# Supplementary material
Source: PubMed Central journal article supplement (PMC5876908)
Supplement: jamafacialplastsurg-20-222-s002.pdf [file jamafacialplastsurg-20-222-s002.pdf]

## Supplementary Online Content

Wu R, Yang X, Jin X, et al. Three-dimensional volumetric analysis of 3 fat-processing techniques for facial fat grafting: a randomized clinical trial. *JAMA Facial Plast Surg*. Published online January 11, 2018. doi:10.1001/jamafacial.2017.2002

**eTable 1.** Percentage volume maintenance of different fat-processing groups in 30 cases

**eTable 2.** Percentage Volume Maintenance of the Fat-Processing Groups at 1-, 3-, 6-, and 12-Month Follow-up

**eTable 3.** Covariance analysis (grouping, gender, age, BMI-1m factor)

**eTable 4.** Covariance analysis (grouping, gender, age, BMI-3m factor)

**eTable 5.** Covariance analysis (grouping, gender, age, BMI-6m factor)

**eTable 6.** Covariance analysis (grouping, gender, age, BMI-12m factor)

**eFigure 1A.** pre-sedimentation

**eFigure 1B.** post-sedimentation

**eFigure 1C.** pre-centrifugation

**eFigure 1D.** post-centrifugation

**eFigure 1E.** the cotton pad filtering

**eFigure 1F.** post-filtration (the residual fat tissue left on the cotton pad was collected again for implantation)

**eFigure 2.** facial volumetric differences of the patient at post-1m

**eFigure 3.** facial volumetric differences of the patient at post-3m

**eFigure 4.** facial volumetric differences of the patient at post-6m

**eFigure 5.** facial volumetric differences of the patient at post-12m

This supplementary material has been provided by the authors to give readers additional information about their work.

**eTable 1. Percentage volume maintenance of different fat-processing groups in 30 cases**

| N  | Gender | Age (y) | Group | Injected Fat Volume (ml) | Percentage volume maintenance |         |         |          |
|----|--------|---------|-------|--------------------------|-------------------------------|---------|---------|----------|
|    |        |         |       |                          | Post-1m                       | Post-3m | Post-6m | Post-12m |
| 1  | Female | 24      | CPF   | 15                       | 52.13%                        | 48.39%  | 42.95%  | -        |
| 2  | Male   | 22      | CPF   | 32                       | 45.82%                        | 41.91%  | 39.65%  | 38.51%   |
| 3  | Female | 19      | CPF   | 35                       | 45.06%                        | 44.24%  | 43.51%  | 41.57%   |
| 4  | Male   | 21      | CPF   | 2.8                      | 54.00%                        | 51.82%  | 47.93%  | 46.14%   |
| 5  | Female | 25      | CPF   | 37                       | 43.98%                        | 42.09%  | 39.71%  | -        |
| 6  | Female | 27      | CPF   | 15                       | 45.90%                        | 43.01%  | 40.69%  | 38.79%   |
| 7  | Female | 45      | CPF   | 2                        | 54.65%                        | 48.10%  | 45.40%  | 44.30%   |
| 8  | Female | 22      | CPF   | 17                       | 49.96%                        | 47.57%  | 46.17%  | -        |
| 9  | Female | 25      | CPF   | 30                       | 47.76%                        | 43.13%  | 42.04%  | 41.54%   |
| 10 | Male   | 28      | CPF   | 40                       | 48.90%                        | 42.29%  | 39.00%  | 37.99%   |
| 11 | Female | 25      | C     | 14                       | 39.46%                        | 31.88%  | 30.83%  | -        |
| 12 | Female | 21      | C     | 31                       | 42.45%                        | 41.83%  | 36.20%  | 34.22%   |
| 13 | Female | 23      | C     | 33                       | 40.25%                        | 36.36%  | 37.21%  | 35.48%   |
| 14 | Male   | 19      | C     | 45                       | 37.51%                        | 35.89%  | 34.57%  | -        |
| 15 | Male   | 39      | C     | 40                       | 43.72%                        | 42.24%  | 40.50%  | -        |
| 16 | Female | 20      | C     | 32                       | 45.47%                        | 44.37%  | 37.95%  | 36.56%   |
| 17 | Female | 27      | C     | 18                       | 37.94%                        | 34.84%  | 32.94%  | 31.30%   |
| 18 | Female | 33      | C     | 16                       | 38.63%                        | 34.20%  | 30.01%  | 29.11%   |
| 19 | Female | 19      | C     | 29                       | 41.87%                        | 39.08%  | 37.83%  | 36.32%   |
| 20 | Female | 21      | C     | 18                       | 45.42%                        | 42.81%  | 39.96%  | 38.11%   |
| 21 | Female | 24      | S     | 14                       | 41.43%                        | 40.70%  | 37.24%  | 35.80%   |
| 22 | Male   | 10      | S     | 40                       | 31.61%                        | 28.68%  | 25.88%  | 25.20%   |
| 23 | Female | 10      | S     | 40                       | 35.80%                        | 33.06%  | 32.90%  | 32.06%   |
| 24 | Female | 23      | S     | 40                       | 35.81%                        | 31.48%  | 30.62%  | 29.85%   |
| 25 | Female | 16      | S     | 48                       | 37.64%                        | 32.99%  | 28.51%  | 28.36%   |
| 26 | Female | 10      | S     | 38                       | 44.61%                        | 42.45%  | 32.20%  | 31.73%   |
| 27 | Female | 11      | S     | 25                       | 38.17%                        | 35.00%  | 34.54%  | 34.12%   |
| 28 | Female | 28      | S     | 30                       | 32.46%                        | 32.30%  | 28.78%  | 28.04%   |
| 29 | Female | 20      | S     | 25                       | 36.80%                        | 32.58%  | 31.66%  | -        |
| 30 | Male   | 10      | S     | 22                       | 35.21%                        | 31.04%  | 28.10%  | -        |

CPF: Cotton pad filtration, C: Centrifugation, S: Sedimentation.

**eTable 2. Percentage Volume Maintenance of the Fat-Processing Groups at 1-, 3-, 6-, and 12-Month Follow-up**

| Group                       | Volume Maintenance, % |       |       |       |
|-----------------------------|-----------------------|-------|-------|-------|
|                             | 1 mo                  | 3 mo  | 6 mo  | 12 mo |
| Cotton pad filtration(n=10) |                       |       |       |       |
| Range                       | 44-55                 | 42-52 | 39-48 | 38-46 |
| Mean(SD)                    | 49(4)                 | 45(3) | 43(3) | 41(3) |
| Centrifugation(n=10)        |                       |       |       |       |
| Range                       | 38-45                 | 32-44 | 30-40 | 29-38 |
| Mean(SD)                    | 41(3)                 | 38(4) | 36(4) | 34(3) |
| Sedimentation(n=10)         |                       |       |       |       |
| Range                       | 32-45                 | 29-42 | 26-37 | 25-36 |
| Mean(SD)                    | 37(4)                 | 34(4) | 31(4) | 31(3) |

**eTable 3. Covariance analysis (grouping, gender, age, BMI-1m factor)**

| <b>Variables</b> | <b>DOF</b> | <b>Mean square</b> | <b>F value</b> | <b>P value</b> |
|------------------|------------|--------------------|----------------|----------------|
| Grouping factor  | 2          | 0.02811658         | 24.96          | <.0001         |
| Gender factor    | 1          | 0.00000556         | 0.00           | 0.9446         |
| Age factor       | 1          | 0.00138538         | 1.23           | 0.2784         |
| BMI-1m           | 1          | 0.00333061         | 2.96           | 0.0984         |

**eTable 4. Covariance analysis (grouping, gender, age, BMI-3m factor)**

| <b>Variables</b> | <b>DOF</b> | <b>Mean square</b> | <b>F value</b> | <b>P value</b> |
|------------------|------------|--------------------|----------------|----------------|
| Grouping factor  | 2          | 0.02617171         | 16.39          | <.0001         |
| Gender factor    | 1          | 0.00003142         | 0.02           | 0.8896         |
| Age factor       | 1          | 0.00013883         | 0.09           | 0.7706         |
| BMI-3m           | 1          | 0.00246405         | 1.54           | 0.2261         |

**eTable 5. Covariance analysis (grouping, gender, age, BMI-6m factor)**

| <b>Variables</b> | <b>DOF</b> | <b>Mean square</b> | <b>F value</b> | <b>P value</b> |
|------------------|------------|--------------------|----------------|----------------|
| Grouping factor  | 2          | 0.02536407         | 20.11          | <.0001         |
| Gender factor    | 1          | 0.00032107         | 0.25           | 0.6185         |
| Age factor       | 1          | 0.00001378         | 0.01           | 0.9176         |
| BMI-6m           | 1          | 0.00055745         | 0.44           | 0.5125         |

**eTable 6. Covariance analysis (grouping, gender, age, BMI-12m factor)**

| <b>Variables</b> | <b>DOF</b> | <b>Mean square</b> | <b>F value</b> | <b>P value</b> |
|------------------|------------|--------------------|----------------|----------------|
| Grouping factor  | 2          | 0.01322109         | 12.38          | 0.0008         |
| Gender factor    | 1          | 0.00126062         | 1.18           | 0.2957         |
| Age factor       | 1          | 0.00060009         | 0.56           | 0.4659         |
| BMI-12m          | 1          | 0.00002791         | 0.03           | 0.8739         |

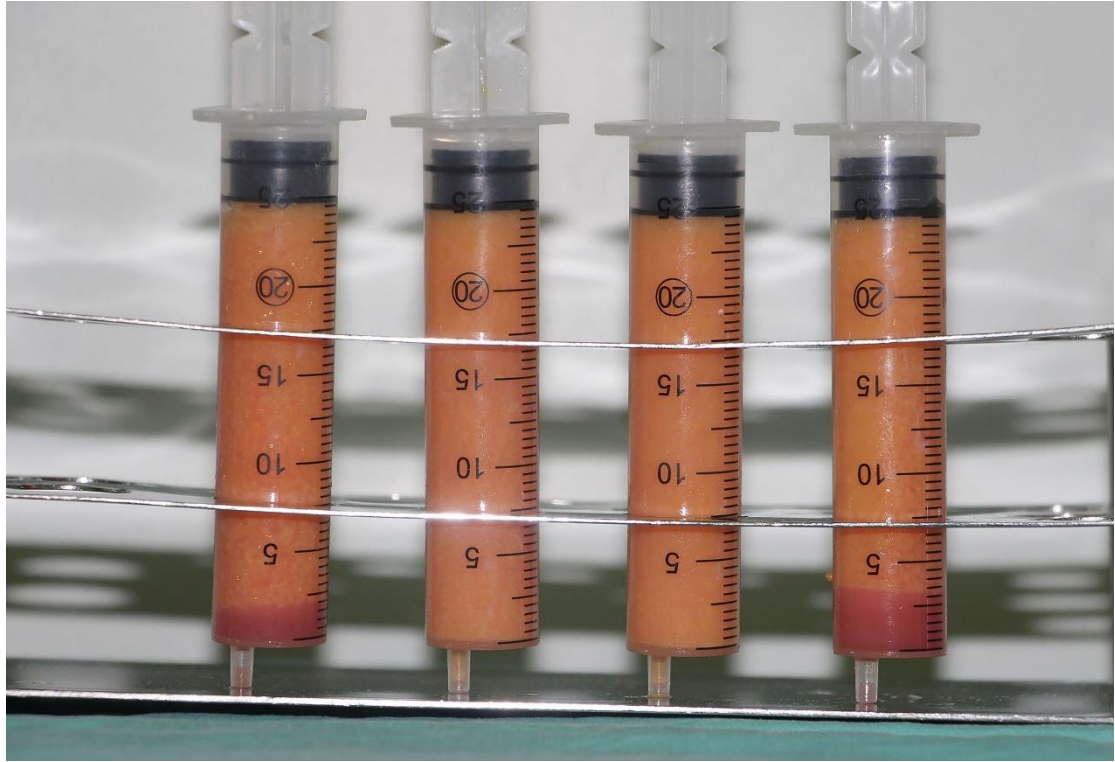

**eFigure 1A.** pre-sedimentation

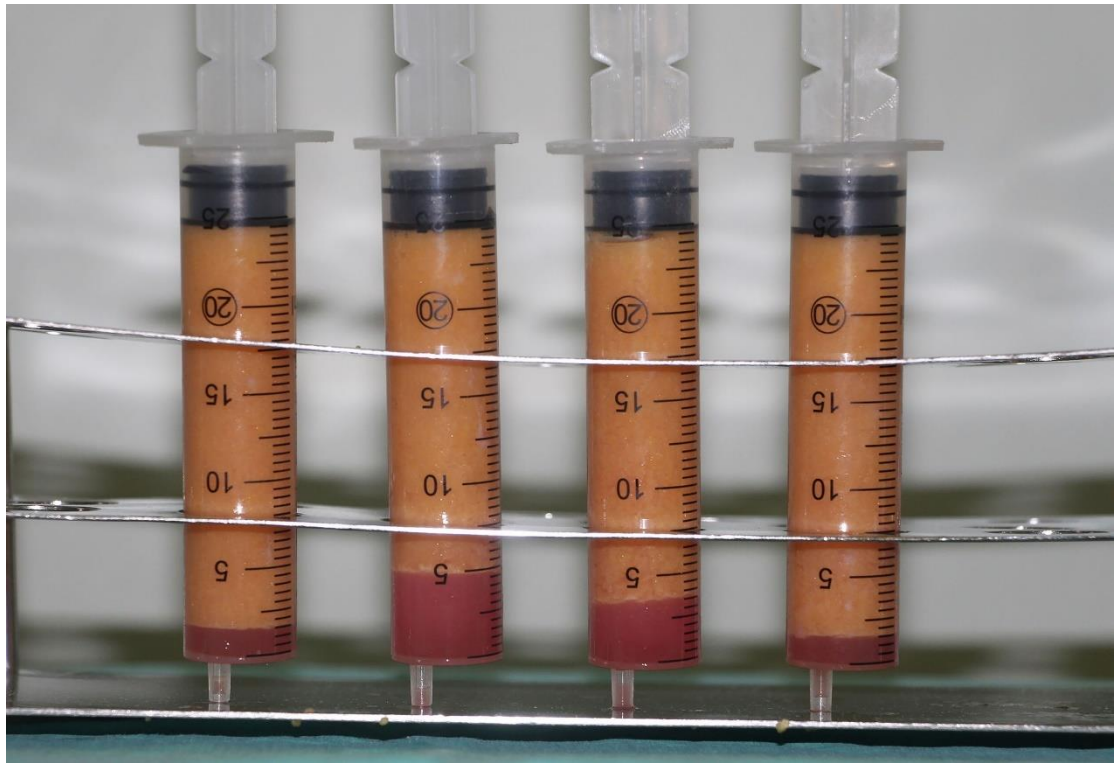

**eFigure 1B.** post-sedimentation

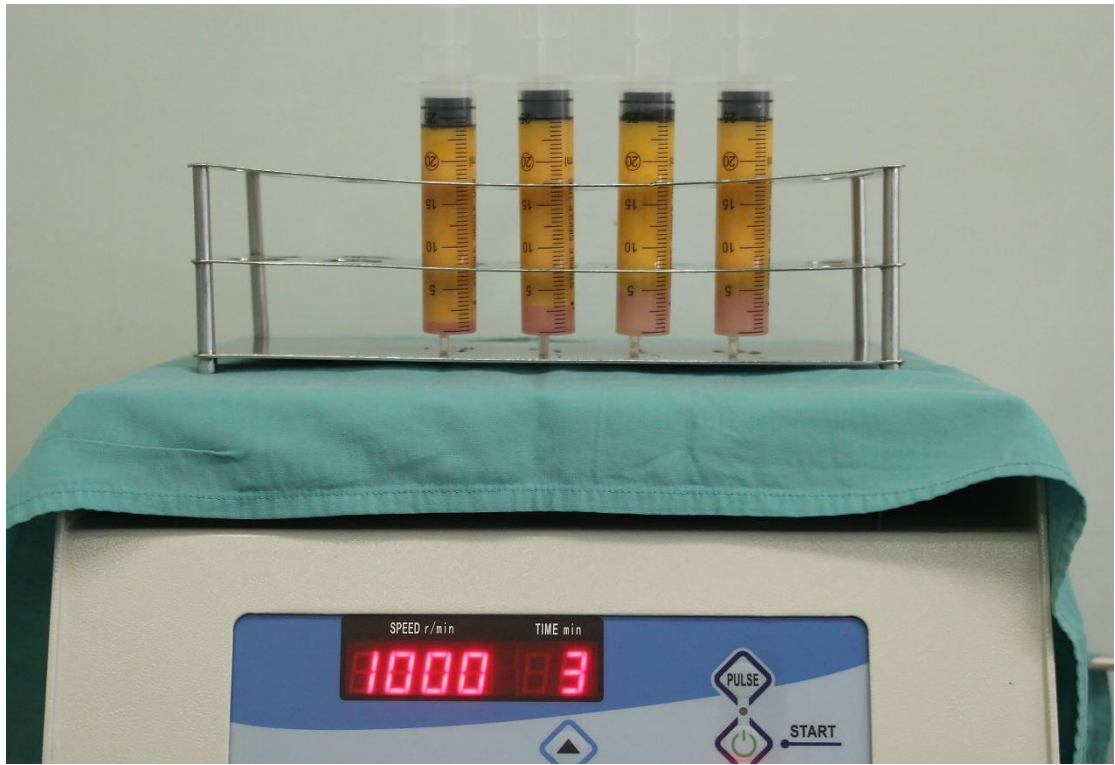

**eFigure 1C.** pre-centrifugation

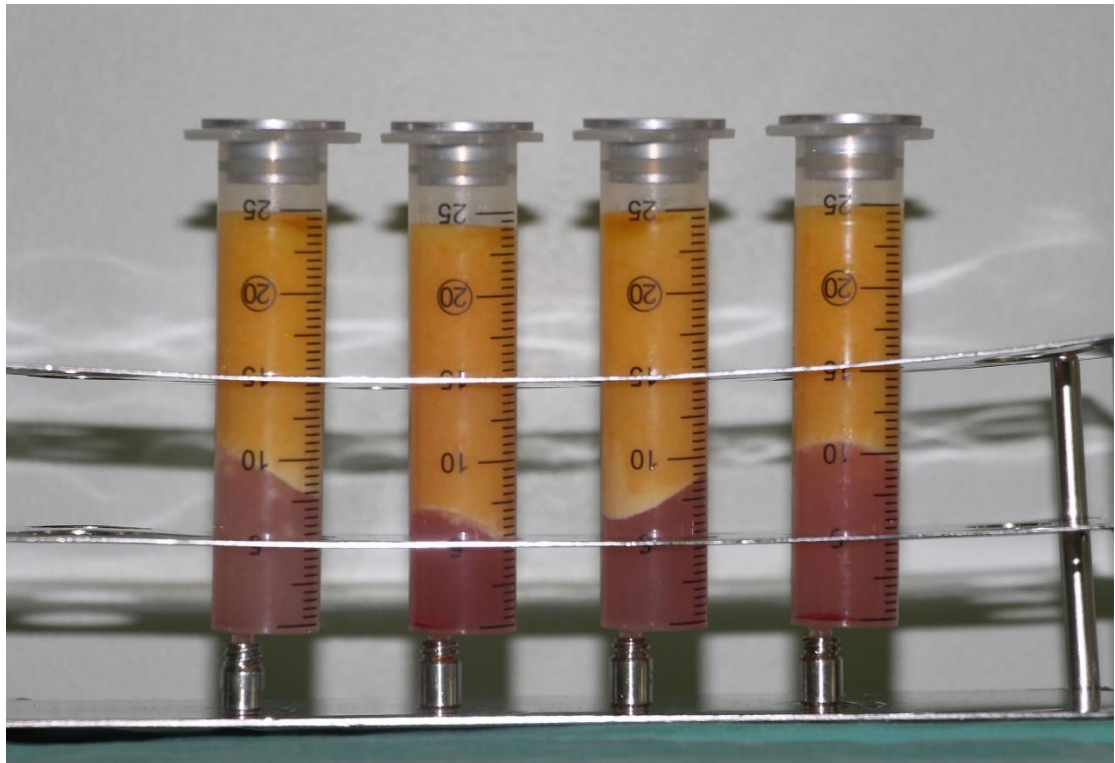

**eFigure 1D.** post-centrifugation



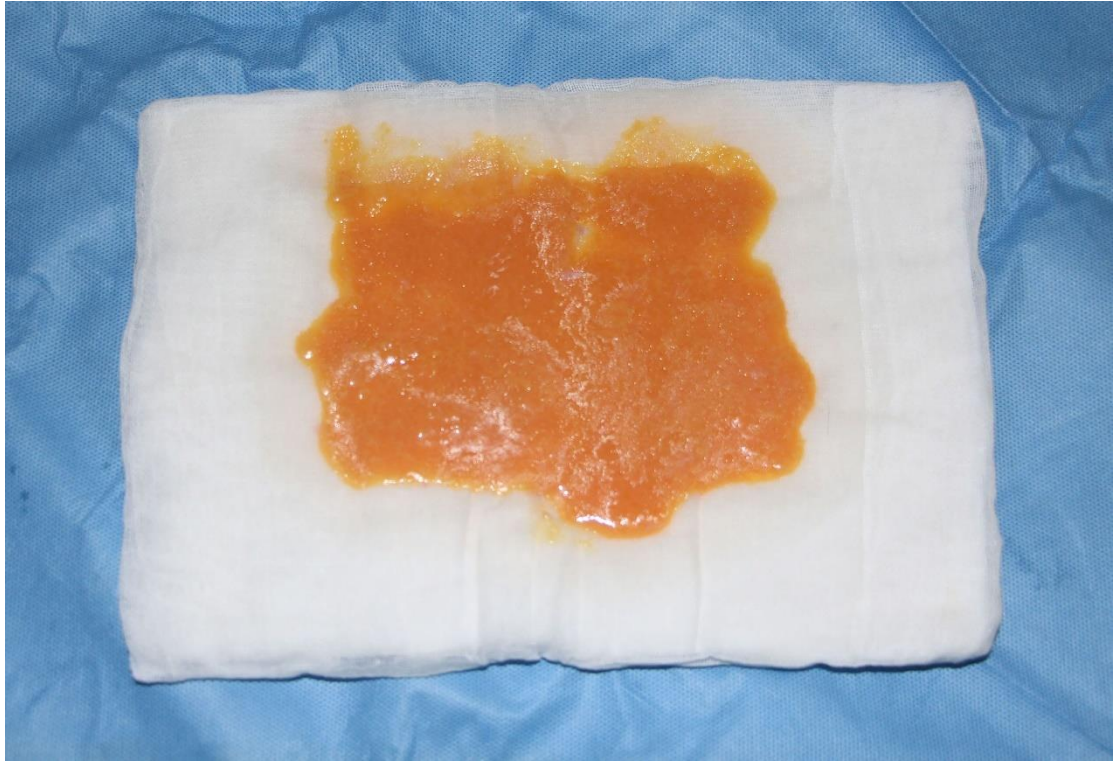

**eFigure 1E.** the cotton pad filtering

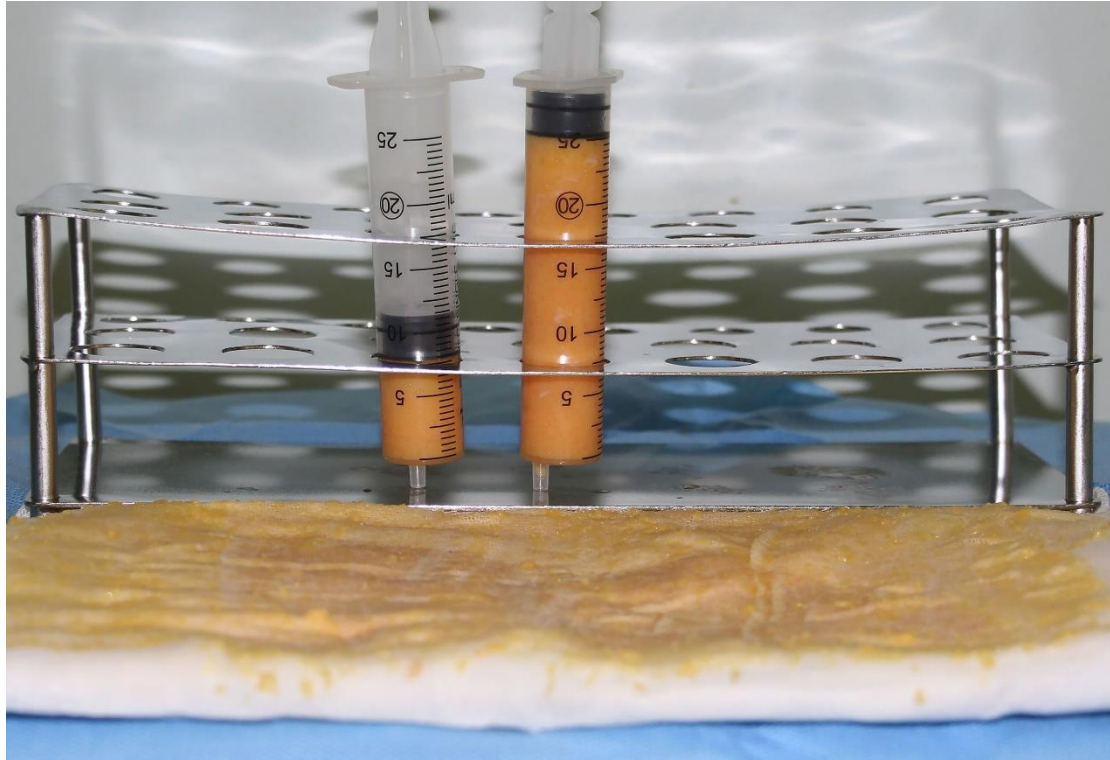

**eFigure 1F.** post-filtration (the residual fat tissue left on the cotton pad was collected again for implantation)

| <b>Dimensions</b>  |                   |
|--------------------|-------------------|
| Minimum dimensions | -52.5837          |
| Maximum dimensions | 27.8164           |
| Dimension delta    | 80.4001           |
| <b>Volume</b>      | <b>15769.8578</b> |

**eFigure 2.** facial volumetric differences of the patient at post-1m

| <b>Dimensions</b>  |                   |
|--------------------|-------------------|
| Minimum dimensions | -52.5837          |
| Maximum dimensions | 27.8164           |
| Dimension delta    | 80.4001           |
| <b>Volume</b>      | <b>15483.8786</b> |

**eFigure 3.** facial volumetric differences of the patient at post-3m

| <b>Dimensions</b>  |                   |
|--------------------|-------------------|
| Minimum dimensions | -52.5837          |
| Maximum dimensions | 27.8164           |
| Dimension delta    | 80.4001           |
| <b>Volume</b>      | <b>15227.0540</b> |

**eFigure 4.** facial volumetric differences of the patient at post-6m

| <b>Dimensi</b> |                   |          |
|----------------|-------------------|----------|
| Minimum ...    | -24.4317          | -51.2828 |
| Maximum ...    | 34.2450           | 12.7043  |
| Dimensio...    | 58.6767           | 63.9871  |
| <b>Volume</b>  | <b>14551.1048</b> |          |

**eFigure 5.** facial volumetric differences of the patient at post-12m
